# Supplementary material
Source: PubMed Central journal article supplement (PMC4289411)
Supplement: NIHMS635491-supplement-125_2014_3414_MOESM1_ESM.pdf [file NIHMS635491-supplement-125_2014_3414_MOESM1_ESM.pdf]

**ESM Table 1 Characteristics of the ERA JUMP participants with normoglycaemia**

| Characteristics                                    | Whites             | Japanese          | <i>p</i> value |
|----------------------------------------------------|--------------------|-------------------|----------------|
| Participants (n)                                   | 151                | 93                |                |
| Age (years)                                        | 44.8 (2.8)         | 44.8 (2.8)        | NS             |
| BMI (kg/m <sup>2</sup> )                           | 27.0 (3.8)         | 22.4 (2.9)        | <0.01          |
| VAT (cm <sup>2</sup> )                             | 158.8 (65.8)       | 108.1 (49.3)      | <0.01          |
| Systolic BP (mmHg)                                 | 120.9 (10.7)       | 122.5 (15.3)      | NS             |
| Current smokers <sup>a</sup> (%)                   | 5.3                | 52.7              | <0.01          |
| Alcohol drinkers <sup>b</sup> (%)                  | 45.0               | 63.4              | <0.01          |
| Hypertension <sup>c</sup> (%)                      | 10.6               | 17.2              | NS             |
| Glucose (mmol/l)                                   | 5.2 (5.0, 5.4)     | 5.3 (5.1, 5.4)    | NS             |
| Insulin (pmol/l)                                   | 82.7 (70.8, 105.6) | 57.6 (40.3, 68.1) | <0.01          |
| Triacylglycerol (mmol/l)                           | 1.4 (0.99, 1.9)    | 1.4 (1.1, 1.9)    | NS             |
| LDL-cholesterol (mmol/l)                           | 3.5 (0.82)         | 3.3 (0.98)        | NS             |
| HDL-cholesterol (mmol/l)                           | 1.3 (0.32)         | 1.5 (0.38)        | <0.01          |
| CRP (nmol/l)                                       | 8.3 (4.2, 18.1)    | 3.1 (1.4, 5.7)    | <0.01          |
| Adiponectin (mg/l)                                 | 11.1 (8.7, 13.8)   | 7.4 (5.1, 8.9)    | <0.01          |
| Hypertension medication (%)                        | 6.6                | 3.2               | NS             |
| Lipid medication (%)                               | 9.3                | 2.2               | NS             |
| Physical activity <sup>d</sup> (%)                 | 78.2               | 21.5              | <0.01          |
| Family history of type 2 diabetes <sup>e</sup> (%) | 20.5               | 21.5              | NS             |

Values are mean (SD) unless specified otherwise

<sup>a</sup> Current smokers were defined as having reported current use of cigarettes or having stopped smoking within the past 30 days

<sup>b</sup> Alcohol drinkers were defined as those who consumed alcohol  $\geq 2$  times/week

<sup>c</sup> Hypertension was defined as systolic blood pressure  $\geq 140$  mm Hg, diastolic blood pressure  $\geq 90$  mm Hg, or use of antihypertensive medications

<sup>d</sup> Physical activity was defined as exercise  $\geq 1$  hour in a week

<sup>e</sup> Family history of type 2 diabetes was defined as either father or mother of participant having type 2 diabetes  
NS, not significant
