# Supplementary material
Source: PubMed Central journal article supplement (PMC4289411)
Supplement: NIHMS635491-supplement-125_2014_3414_MOESM2_ESM.pdf [file NIHMS635491-supplement-125_2014_3414_MOESM2_ESM.pdf]

**ESM Table 2 Characteristics of the ERA JUMP participants with IFG**

| Characteristics                       | Whites              | Japanese          | <i>p</i> value |
|---------------------------------------|---------------------|-------------------|----------------|
| Participants (n)                      | 147                 | 201               |                |
| Age (years)                           | 45.2 (2.8)          | 45.2 (2.8)        | NS             |
| BMI (kg/m <sup>2</sup> )              | 28.7 (4.5)          | 24.0 (2.8)        | <0.01          |
| VAT (cm <sup>2</sup> )                | 183.8 (79.0)        | 142.4 (48.5)      | <0.01          |
| Systolic BP (mmHg)                    | 124.1 (11.6)        | 125.5 (16.2)      | NS             |
| Current smokers (%)                   | 9.5                 | 49.3              | <0.01          |
| Alcohol drinkers (%)                  | 44.2                | 68.7              | <0.01          |
| Hypertension (%)                      | 18.4                | 27.9              | NS             |
| Glucose (mmol/l)                      | 5.8 (5.7, 6.1)      | 5.9 (5.7, 6.2)    | <0.01          |
| Insulin (pmol/l)                      | 101.4 (72.9, 137.5) | 69.5 (55.6, 88.2) | <0.01          |
| Triacylglycerol (mmol/l)              | 1.5 (1.0, 2.2)      | 1.6 (1.2, 2.1)    | NS             |
| LDL-cholesterol (mmol/l)              | 3.5 (0.93)          | 3.5 (0.90)        | NS             |
| HDL-cholesterol (mmol/l)              | 1.2 (0.34)          | 1.4 (0.33)        | <0.01          |
| CRP (nmol/l)                          | 9.2 (5.5, 15.4)     | 3.1 (1.4, 6.8)    | <0.01          |
| Adiponectin (mg/l)                    | 9.3 (7.2, 12.6)     | 5.8 (4.4, 7.9)    | <0.01          |
| Hypertension medication (%)           | 8.8                 | 6.0               | NS             |
| Lipid medication (%)                  | 15.0                | 3.5               | <0.01          |
| Physical activity (%)                 | 67.4                | 28.4              | <0.01          |
| Family history of type 2 diabetes (%) | 30.6                | 24.4              | NS             |

Values are mean (SD) unless specified otherwise  
Refer table 1 for definitions and abbreviations
