# Supplementary material
Source: PubMed Central journal article supplement (PMC4289411)
Supplement: NIHMS635491-supplement-125_2014_3414_MOESM3_ESM.pdf [file NIHMS635491-supplement-125_2014_3414_MOESM3_ESM.pdf]

**ESM Table 3 Comparison of HOMA-IR, HOMA-β% and DI between white men and Japanese men with normoglycaemia in the ERA JUMP study<sup>a</sup>**

| Characteristics           | Whites              | Japanese           | <i>p</i> value |
|---------------------------|---------------------|--------------------|----------------|
| Participants (n)          | 151                 | 93                 |                |
| Insulin Resistance Marker |                     |                    |                |
| HOMA-IR                   | 2.6 (2.4-2.8)       | 2.1 (1.9-2.3)      | <0.01          |
| Insulin Secretion Markers |                     |                    |                |
| HOMA-β%                   | 139.1 (128.5-150.6) | 101.9 (90.8-114.4) | <0.01          |
| DI                        | 53.0 (50.8-55.3)    | 49.2 (46.3-52.3)   | 0.10           |

Values are geometric means (95% CI)

<sup>a</sup>Adjusted for visceral adipose tissue, BMI, current smokers, alcohol drinkers, physical activity, lipid medication, C-reactive protein, and adiponectin
