# Supplementary material
Source: PubMed Central journal article supplement (PMC4289411)
Supplement: NIHMS635491-supplement-125_2014_3414_MOESM4_ESM.pdf [file NIHMS635491-supplement-125_2014_3414_MOESM4_ESM.pdf]

**ESM Table 4 Comparison of HOMA-IR, HOMA-β%, and DI between white men and Japanese men with impaired fasting glucose in the ERA JUMP study<sup>a</sup>**

| Characteristics           | Whites              | Japanese         | <i>p</i> value |
|---------------------------|---------------------|------------------|----------------|
| Participants (n)          | 147                 | 201              |                |
| Insulin Resistance Marker |                     |                  |                |
| HOMA-IR                   | 3.4 (3.1-3.7)       | 2.9 (2.7-3.1)    | 0.03           |
| Insulin Secretion Markers |                     |                  |                |
| HOMA-β%                   | 109.2 (100.3-118.9) | 88.0 (82.1-94.3) | <0.01          |
| DI                        | 32.6 (31.3-34.0)    | 30.2 (29.2-31.2) | 0.02           |

Values are geometric means (95% CI)

<sup>a</sup>Adjusted for visceral adipose tissue, BMI, current smokers, alcohol drinkers, physical activity, lipid medication, C-reactive protein, and adiponectin
