# Supplementary material
Source: PubMed Central journal article supplement (PMC4289411)
Supplement: NIHMS635491-supplement-125_2014_3414_MOESM5_ESM.pdf [file NIHMS635491-supplement-125_2014_3414_MOESM5_ESM.pdf]

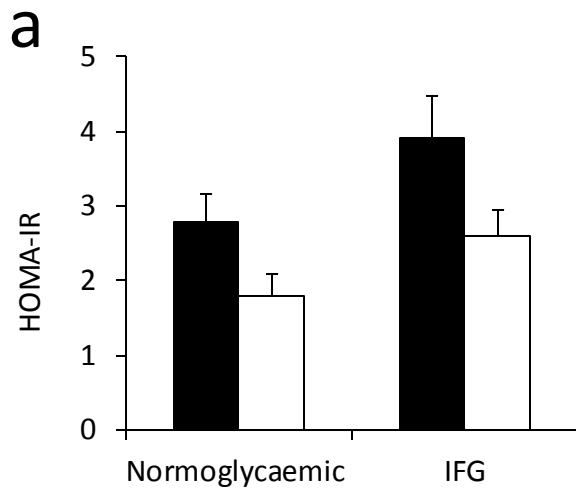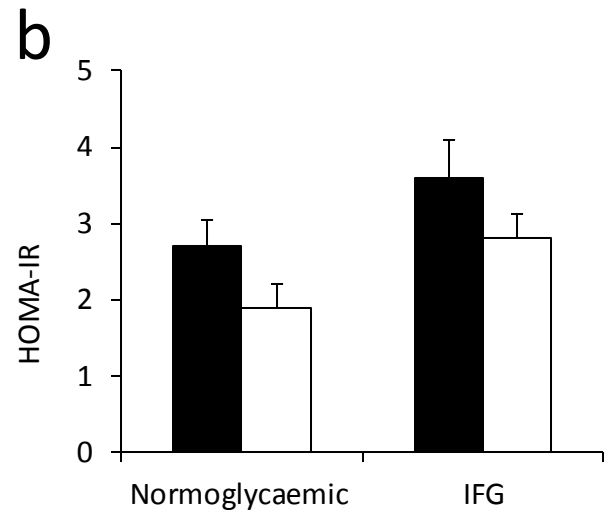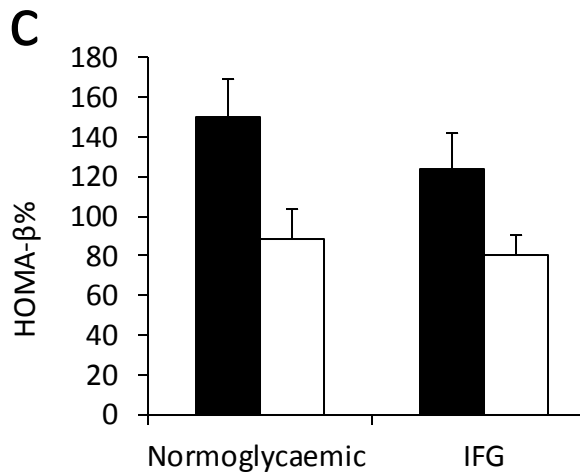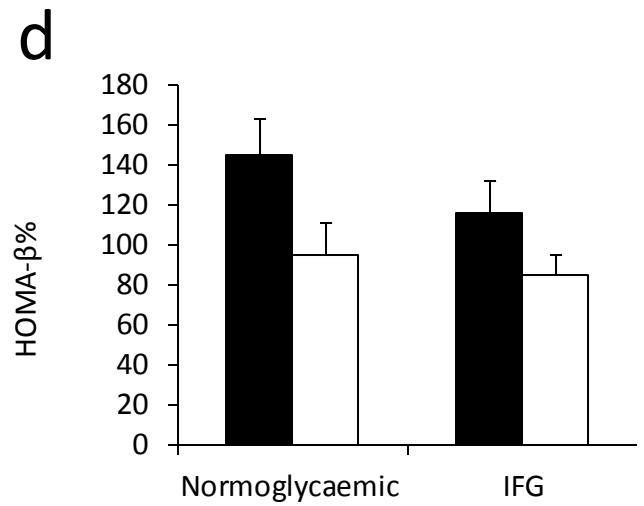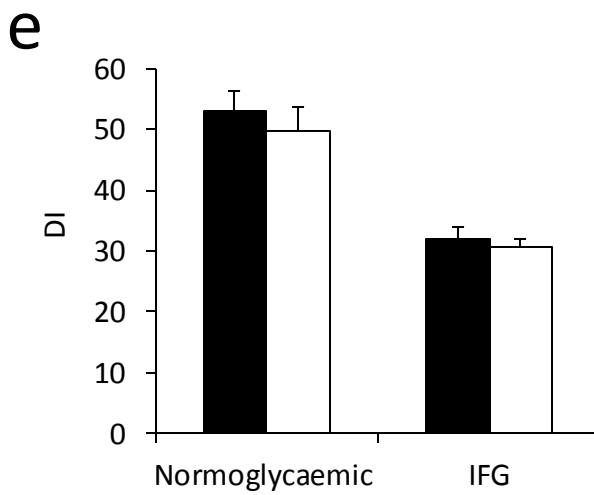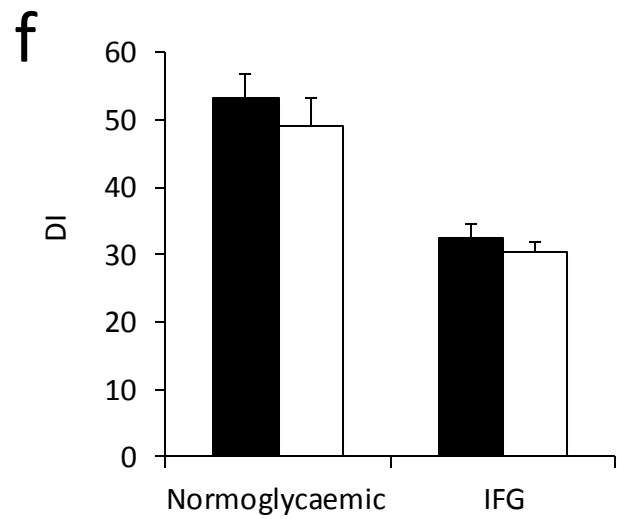

**Figure 1:** HOMA-IR, HOMA- $\beta$  %, and DI by race and fasting-glucose state without (**a**, **c** and **e** respectively) and with (**b**, **d** and **f** respectively) adjustment for VAT in the ERA JUMP study. Data are geometric mean  $\pm$  95% CI. HOMA-IR, HOMA- $\beta$  % and DI were significantly different ( $p < 0.01$ ) between white men and Japanese men, before and after adjustment for VAT. Black bars, white men; white bars, Japanese men
